# Supplementary material for: Synthesis and evaluation of ion-imprinted composite membranes of Cr(vi) based on β-diketone functional monomers
Source: Royal Society of Chemistry journal article supplement (doi:10.1039/d1ra07678g), 2021-01-01
Supplement: d1ra07678g1.pdf [file d1ra07678g1.pdf]

## Supporting Information

Table 1. Preparation conditions for Cr(VI) ion-implanted composite membranes (Cr(VI)-IICMs).

| Membranes                 | Cr(VI)<br>(mmol) | ADPD<br>(mmol) | EDMA<br>(mmol) | Solvents<br>(v/v, 1:1)                             | Cr(VI):ADPD<br>:EDMA |
|---------------------------|------------------|----------------|----------------|----------------------------------------------------|----------------------|
| Cr(VI)-IICM <sub>1</sub>  | 0.5              | 1.0            | 20.0           | CH <sub>3</sub> OH:H <sub>2</sub> O                | 1:2:40               |
| Cr(VI)-IICM <sub>2</sub>  | 0.5              | 1.0            | 20.0           | CH <sub>3</sub> CN: H <sub>2</sub> O               | 1:2:40               |
| Cr(VI)-IICM <sub>3</sub>  | 0.5              | 1.0            | 20.0           | C <sub>3</sub> H <sub>7</sub> OH: H <sub>2</sub> O | 1:2:40               |
| Cr(VI)-IICM <sub>4</sub>  | 0.5              | 1.0            | 20.0           | C <sub>2</sub> H <sub>5</sub> OH: H <sub>2</sub> O | 1:2:40               |
| Cr(VI)-IICM <sub>5</sub>  | 0.5              | 2.0            | 20.0           | C <sub>2</sub> H <sub>5</sub> OH: H <sub>2</sub> O | 1:4:40               |
| Cr(VI)-IICM <sub>6</sub>  | 0.5              | 3.0            | 20.0           | C <sub>2</sub> H <sub>5</sub> OH: H <sub>2</sub> O | 1:6:40               |
| Cr(VI)-IICM <sub>7</sub>  | 0.5              | 4.0            | 20.0           | C <sub>2</sub> H <sub>5</sub> OH: H <sub>2</sub> O | 1:8:40               |
| Cr(VI)-IICM <sub>8</sub>  | 0.5              | 3.0            | 5.0            | C <sub>2</sub> H <sub>5</sub> OH: H <sub>2</sub> O | 1:6:10               |
| Cr(VI)-IICM <sub>9</sub>  | 0.5              | 3.0            | 10.0           | C <sub>2</sub> H <sub>5</sub> OH: H <sub>2</sub> O | 1:6:20               |
| Cr(VI)-IICM <sub>10</sub> | 0.5              | 3.0            | 15.0           | C <sub>2</sub> H <sub>5</sub> OH: H <sub>2</sub> O | 1:6:30               |
| Cr(VI)-IICM <sub>11</sub> | 0.5              | 3.0            | 25.0           | C <sub>2</sub> H <sub>5</sub> OH: H <sub>2</sub> O | 1:6:50               |

\*Amount of initiator (AIBN) used was 15.0 mg.

Scheme 1. Synthesis of 2-allyl-1,3-diphenyl-1,3-propanedione (ADPD).

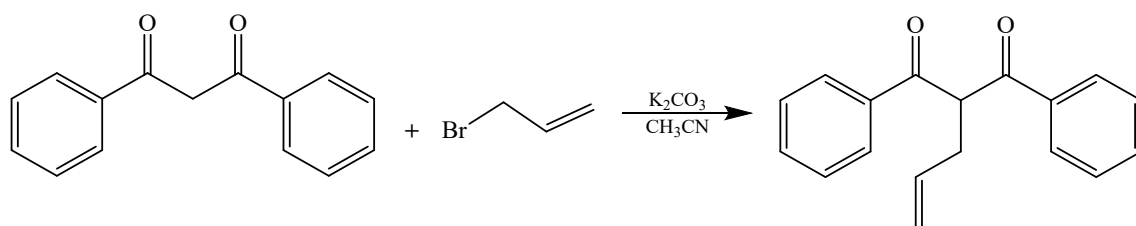

Fig 1. Schematic diagram of the H-type permeation device.

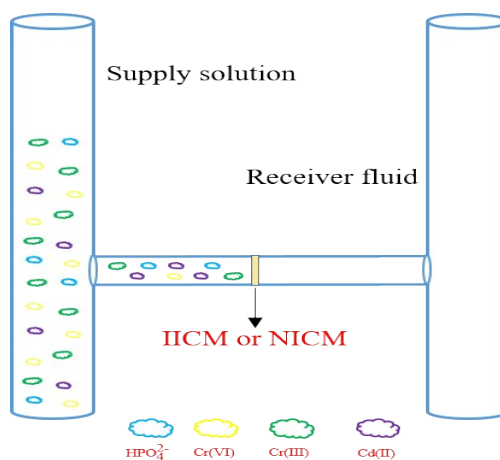

Fig.2. Nitrogen adsorption/desorption curves of the (a) nylon, (b) Cr(VI)-IICM<sub>10</sub>, and (c) NICM<sub>10</sub> membranes.

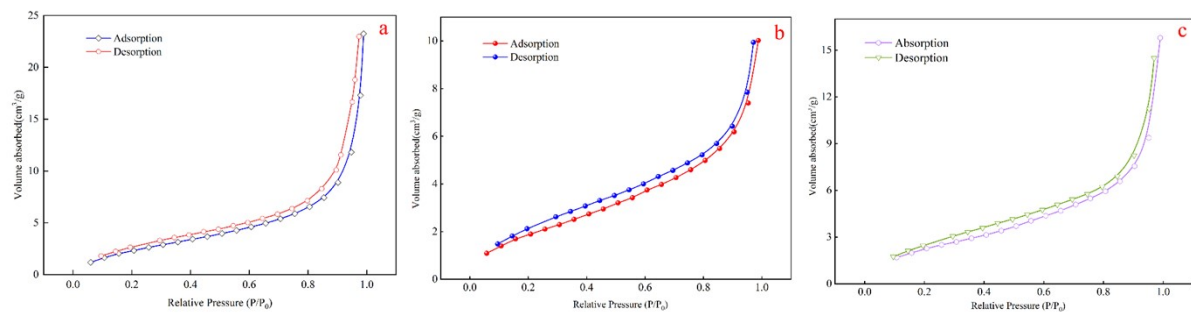

Table 2. Correlation parameters of the Langmuir and Freundlich fitting curves for Cr(VI)-IICM<sub>10</sub> and NICM<sub>10</sub>.

| Isotherm model            | Langmuir     |        |              |        | Freundlich |        |        |
|---------------------------|--------------|--------|--------------|--------|------------|--------|--------|
|                           | $Q_e$ (mg/g) | $K_L$  | $Q_m$ (mg/g) | $R^2$  | $K_F$      | $1/n$  | $R^2$  |
| Cr(VI)-IICM <sub>10</sub> | 29.66        | 0.0475 | 35.13        | 0.9985 | 5.813      | 0.3560 | 0.9562 |
| NICM <sub>10</sub>        | 11.47        | 0.0169 | 16.17        | 0.9959 | 1.012      | 0.4935 | 0.9815 |
